# Supplementary material
Source: Springer Nature journal article supplement (https://www.springermedizin.de/resource/supplementary/13048_2011_84_MOESM5_ESM.pdf/9664954)

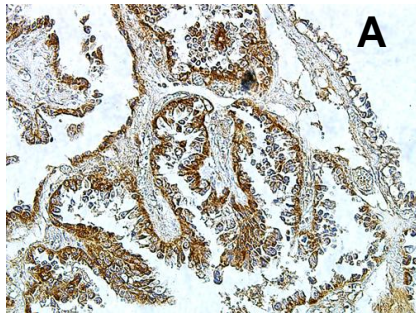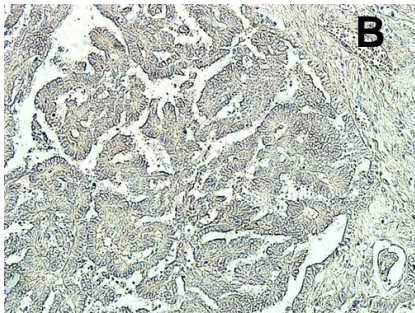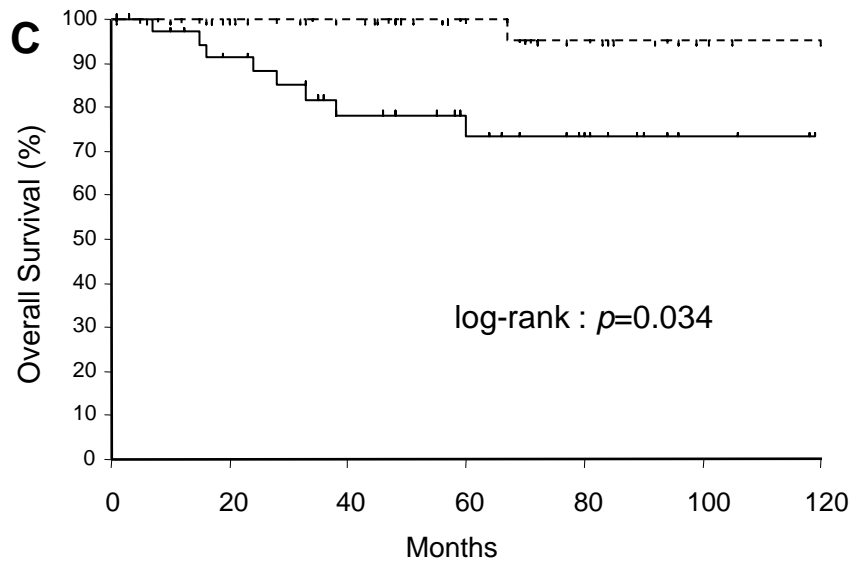

Supplement: MOESM5 [file 9664954]
